# Supplementary material for: A J-aggregated nanoporphyrin overcoming phototoxic side effects in superior phototherapy with two-pronged effects
Source: Royal Society of Chemistry journal article supplement (doi:10.1039/d2sc04873f), 2022-01-01

## Supporting information 2:

### 1. Full gel and blot for Fig. S11 (HSP90 and HSP70)

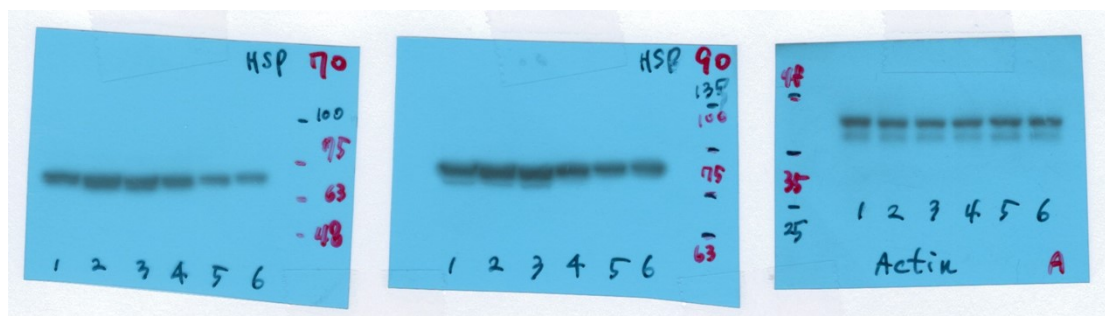

### 2. Full gel and blot for Fig. 5f (survivin) and Fig. S14 (caspase 9)

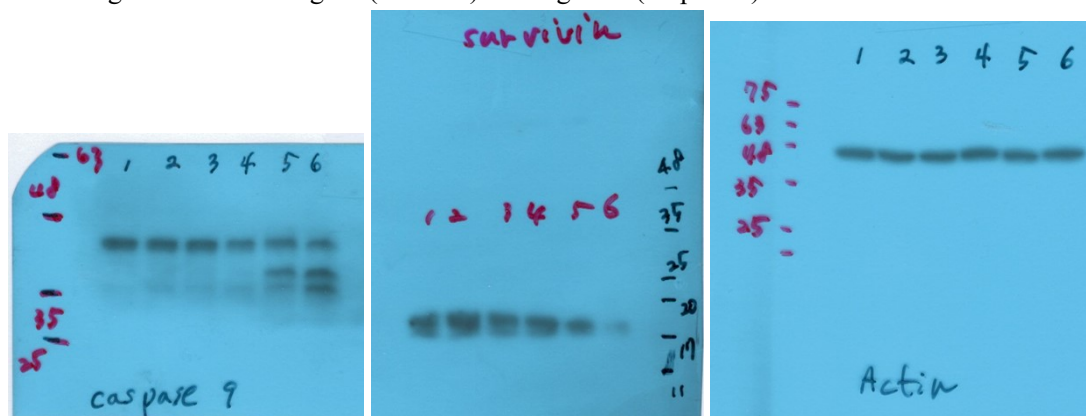

(1. control, 2. 45 °C for 30 min, 3. 690 nm laser, 4. MTE, 5. MTE + 45 °C for 30 min, 6. MTE + 690 nm laser)

3. Full gel and blot for Fig. 5g (caspase 3 and PARP)

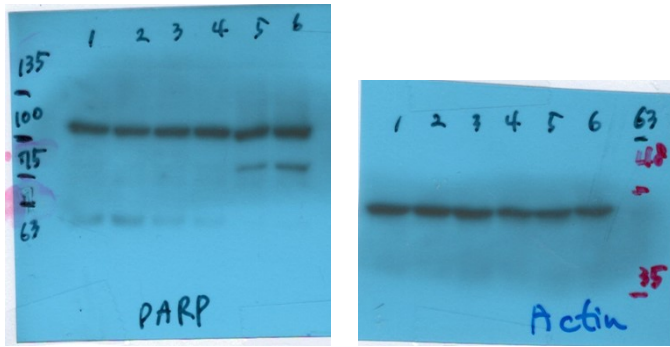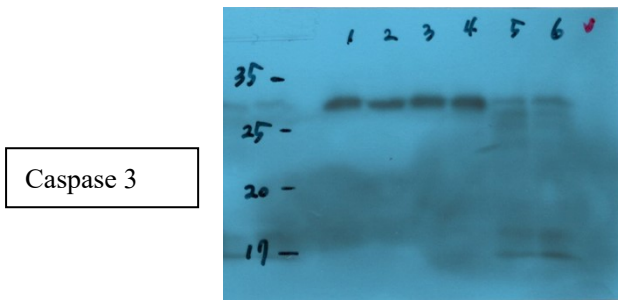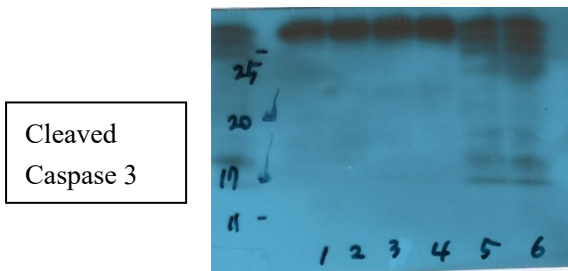

Supplement: d2sc04873f1.pdf [file d2sc04873f1.pdf]
